# Supplementary material for: Non-classical (NC), heptagon-containing fullerenes obtained via chlorination-promoted cage transformations: C76(NC2a)Cl24 and C76(NC2b)Cl28
Source: Royal Society of Chemistry journal article supplement (doi:10.1039/d3cc05336a), 2024-01-01
Supplement: d3cc05336a1.pdf [file d3cc05336a1.pdf]

## Supporting Information

Non-classical (NC), heptagon-containing fullerenes obtained via chlorination-promoted cage transformations:  $C_{76}(NC2a)Cl_{24}$  and  $C_{76}(NC2b)Cl_{28}$

Victor A. Brotsman\*, and Sergey I. Troyanov

*Chemistry Department, Moscow State University, Leninskie gory, 119991 Moscow, Russia*

E-mail: [brotsman\\_va@mail.ru](mailto:brotsman_va@mail.ru)

### Synthesis and isolation of $C_{76}$ chlorofullerenes.

The samples of  $C_{76}(1)$  and  $C_{80}(2)$  fullerenes were obtained by HPLC separation as described previously in refs.<sup>S1-2</sup>. Procedures of fullerenes chlorination with inorganic chlorides,  $SbCl_5$  and  $VCl_4$ , were described more detailed in refs.<sup>S1,3</sup>. The chlorination products of  $C_{76}(1)$  with  $SbCl_5$  were dissolved in toluene and subjected to HPLC separation in toluene using a semipreparative *Cosmosil Buckyprep* column (10 mm I.D. x 25 cm, *Nacalai Tesque Inc.*) at a flow rate  $4.6\text{ mL}\cdot\text{min}^{-1}$  (**Figure S1**). The composition of the collected fractions was controlled by recording MALDI TOF mass spectra, which revealed the presence of  $C_{76}Cl_n$  compounds with  $n$  ranging from 22 to 26. The negative ion MALDI mass spectrum of fraction containing  $C_{76}Cl_{24}$  is shown on **Figure S2**. This fraction gave crystals of  $C_{76}(NC2a)Cl_{24}$  by slow concentration of the toluene solution. Tiny, orange coloured crystals of  $C_{76}(NC2b)Cl_{28}$  were obtained after removal of an excess of  $VCl_4$  and  $VCl_3$  from the products of  $C_{80}(2)$  chlorination.

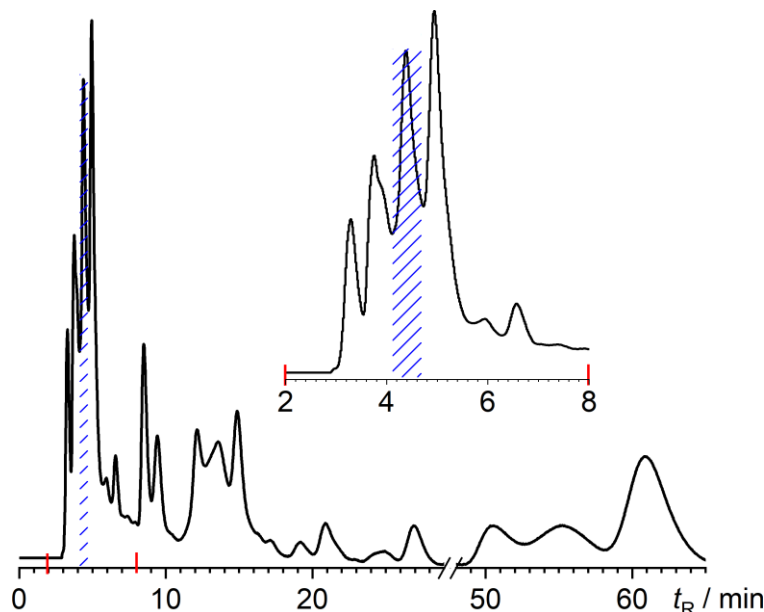

**Figure S1.** HPLC separation of the chlorination products of fullerene  $C_{76}(1)$  with  $SbCl_5$  (*Cosmosil Buckyprep* column, 10 mm I.D. x 25 cm, toluene,  $4.6\text{ mL}\cdot\text{min}^{-1}$ ). Inset show the enlarged region of HPLC traces (2–8 min). Crystals were obtained from fraction marked as blue dashed area.

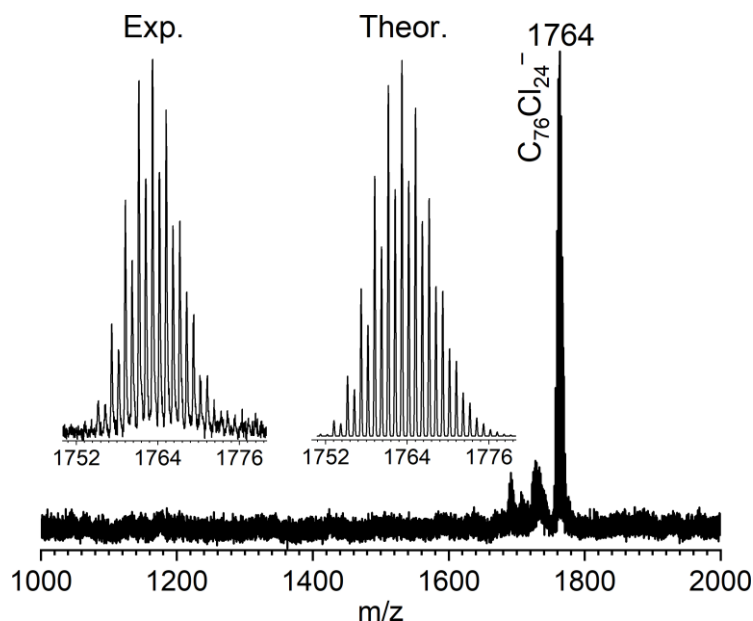

**Figure S2.** Negative-ion MALDI mass spectrum of fraction containing  $C_{76}Cl_{24}$ .

### X-ray crystallography

Synchrotron X-ray data were collected at 100 K on BL14.3 and BL14.2 at the BESSY storage ring (Berlin, Germany) using a MAR225 CCD detector ( $\lambda = 0.8950 \text{ \AA}$  and  $\lambda = 0.8551 \text{ \AA}$ ). All structures were solved and anisotropically refined using the SHELX package. Selected crystallographic data, some details of data collection and refinement, and CCDC deposition numbers are given in Table S1.

**Table S1.** Selected crystallographic data for non-classical  $C_{76}$  chlorofullerenes.

| Compound                                              | $C_{76}(NC2a)Cl_{24}$ | $C_{76}(NC2b)Cl_{28}$ |
|-------------------------------------------------------|-----------------------|-----------------------|
| Solvate molecule                                      | PhMe                  | —                     |
| Molecular Formula                                     | $C_{83}H_8Cl_{24}$    | $C_{76}Cl_{24}$       |
| $M_r$                                                 | 1855.69               | 1905.36               |
| crystal system                                        | monoclinic            | monoclinic            |
| space group                                           | $C2/c$                | $C2/c$                |
| $a$ [ $\text{\AA}$ ]                                  | 23.672(1)             | 17.137(1)             |
| $b$ [ $\text{\AA}$ ]                                  | 21.259(1)             | 23.973(2)             |
| $c$ [ $\text{\AA}$ ]                                  | 16.433(1)             | 15.008(1)             |
| $\alpha$ [ $^\circ$ ]                                 | 90                    | 90                    |
| $\beta$ [ $^\circ$ ]                                  | 131.763(9)            | 90.389(8)             |
| $\gamma$ [ $^\circ$ ]                                 | 90                    | 90                    |
| $V$ [ $\text{\AA}^3$ ]                                | 6168.5(8)             | 6165.5(8)             |
| $Z$                                                   | 4                     | 4                     |
| $D_c$ [ $\text{g cm}^{-3}$ ]                          | 1.998                 | 2.053                 |
| refls collected / $R_{\text{int}}$                    | 47561 / 0.062         | 46192 / 0.041         |
| data / parameters                                     | 6854 / 514            | 7328 / 508            |
| $R_1(I \geq 2\sigma(I))$ / $wR_2(\text{all})$         | 0.042 / 0.119         | 0.045 / 0.106         |
| $\Delta\rho_{\text{max/min}}$ [ $\text{e \AA}^{-3}$ ] | 0.72 / -0.57          | 1.10 / -0.57          |
| CCDC                                                  | 2303657               | 1014799               |

## Quantum-chemical calculations

Molecular geometry of C<sub>76</sub> chlorofullerenes was optimized by TINKER v. 8 molecular mechanic package with MM2 parameter sets.<sup>S4</sup> Preliminary optimization of molecular geometry was carried out at the AM1 level of theory with the use of the Firefly 8.2.0 program<sup>S5</sup> partly based on the GAMESS(US) software.<sup>S6</sup> Finally, molecular geometry formation energy of C<sub>76</sub> chlorofullerenes was reoptimized at the DFT level of theory with the use of the PRIRODA software<sup>S7</sup> employing an original TZ2p basis set<sup>S8</sup> and PBE exchange–correlation functional.<sup>S9</sup> The applicability of this calculation approach for fullerenes and their derivatives was confirmed in many previous reports.

## References

- (S1) I. N. Ioffe, A. A. Goryunkov, N. B. Tamm, L. N. Sidorov, E. Kemnitz and S. I. Troyanov, *Angew. Chem., Int. Ed.*, 2009, **48**, 5904.
- (S2) S. Yang, T. Wei, N. B. Tamm, E. Kemnitz and S. I. Troyanov, *Inorg. Chem.*, 2013, **52**, 4768.
- (S3) I. N. Ioffe, C. Chen, S. F. Yang, L. N. Sidorov, E. Kemnitz and S. I. Troyanov, *Angew. Chem. Int. Ed.*, 2010, **49**, 4784.
- (S4) J. A. Rackers, Z. Wang, C. Lu, M.L. Laury, L. Lagardère, M. J. Schnieders, J.-P. Piquemal, P. Ren, J. W. Ponder, *J. Chem. Theory Comput.*, 2018, **14**, 5273.
- (S5) A. A. Granovsky, Firefly v. 8.2.0 (Formerly PC GAMESS), <http://classic.chem.msu.su/gran/firefly/index.html>, 2016.
- (S6) M. W. Schmidt, K. K. Baldridge, J. A. Boatz, S. T. Elbert, M. S. Gordon, J. H. Jensen, S. Koseki, N. Matsunaga, K. A. Nguyen, S. Su, T. L. Windus, M. Dupuis, J. A. Montgomery, *J. Comput. Chem.*, 1993, **14**, 1347.
- (S7) D. N. Laikov, *Chem. Phys. Lett.*, 1997, **281**, 151.
- (S8) D. N. Laikov, *Chem. Phys. Lett.*, 2005, **416**, 116.
- (S9) J. P. Perdew, K. Burke and M. Ernzerhof, *Phys. Rev. Lett.*, 1996, **77**, 3865.
